# Supplementary material for: Integrated Analysis of LncRNA-Mediated ceRNA Network in Calcific Aortic Valve Disease
Source: MDPI journal article supplement (doi:10.3390/cells11142204), 2022-07-14
Supplement: s1 [file s1]

# Supplementary files

Table S1. Clinical characteristics of patients for RT-qPCR analysis

|                                           | Non-mineralized valves | Calcific valves | P      |
|-------------------------------------------|------------------------|-----------------|--------|
| Sample, n                                 | 20                     | 30              |        |
| Age, years                                | 55.3 ± 8.2             | 58.4 ± 3.83     | 0.08   |
| Male, n (%)                               | 12 (60.0)              | 18 (60.0)       | 1      |
| BMI, Kg/m <sup>2</sup>                    | 22.6 ± 2.9             | 23.5 ± 2.7      | 0.27   |
| Smoking, n (%)                            | 10 (50.0)              | 13 (43.3)       | 0.64   |
| Diabetes mellitus, n (%)                  | 5 (25.0)               | 6 (20.0)        | 0.68   |
| Hypertension, n (%)                       | 8 (40.0)               | 9 (30.0)        | 0.47   |
| Hyperlipidemia, n (%)                     | 6 (30.0)               | 8 (26.7)        | 0.80   |
| BAV, n (%)                                | 0                      | 3 (10)          | 0.16   |
| LVEF, (%)                                 | 30.1 ± 7.4             | 64.5 ± 8.3      | <0.001 |
| Statins, n(%)                             | 6 (30)                 | 8 (26.7)        | 0.80   |
| β-Blockers, n (%)                         | 12 (60)                | 16 (53.3)       | 0.64   |
| ACEi/ARB, n(%)                            | 11 (55.5)              | 18 (60)         | 0.73   |
| Transvalvular pressure gradient<br>(mmHg) | 13.36 ± 3.82           | 73.24 ± 26.31   | <0.001 |
| AVA, cm <sup>2</sup>                      | 3.69 ± 0.46            | 0.68 ± 0.21     | <0.001 |
| AS, n (%)                                 | 0                      | 30              | <0.001 |

Note: Values are means ± standard deviation or n (%).

Abbreviations: BMI, body mass index; LVEF, left ventricular ejection fraction; BAV, bicuspid aortic valve; AS, aortic stenosis, AVA, aortic valve area.

Table S2. The primer sequences for real-time polymerase chain reaction

| Primers for qPCR   | Primer sequence (5' to 3') |
|--------------------|----------------------------|
| U6 forward         | CGCTTCGGCAGCACATATAC       |
| U6 reverse         | TTCACGAATTTGCGTGTTCATC     |
| GAPDH forward      | TGATGACATCAAGAAGGTGG       |
| GAPDH reverse      | TTGTCATACCAGGAAATGAGC      |
| ZNF436-AS1 forward | GACTCCCACCCTCTTCAAGTT      |
| ZNF436-AS1 reverse | AAATAACCGGGCACTGGGAA       |

Table S3. The differentially expressed mRNAs downloaded from STRING was processed using MCODE for further gene cluster analysis. An analysis of gene clusters with top 5 scores was conducted and presented in a table below.

| Cluster | Score<br>(Density*#Nodes) | Nodes | Edges | Node IDs                                                                                                                                                                                                                                                                                                                                                                                                                                                                                                                                                                                                                                                                                                                                                                                                                                                                                                       |
|---------|---------------------------|-------|-------|----------------------------------------------------------------------------------------------------------------------------------------------------------------------------------------------------------------------------------------------------------------------------------------------------------------------------------------------------------------------------------------------------------------------------------------------------------------------------------------------------------------------------------------------------------------------------------------------------------------------------------------------------------------------------------------------------------------------------------------------------------------------------------------------------------------------------------------------------------------------------------------------------------------|
| 1       | 36.873                    | 72    | 1309  | AGT, APLNR, ADCY4, APLN, CXCL9, OPRL1, PPBP, GPR37L1, SERPINH1, PLOD1, COL5A2, COL5A1, FPR2, ADORA3, P2RY14, CCL19, S1PR4, COL9A1, COL9A3, COL6A5, CXCL3, CXCL1, CXCR2, COL8A1, SAA1, COL3A1, CXCL11, CXCR1, COL2A1, S1PR5, CXCL12, COL12A1, COL1A2, COL1A1, COL4A4, COL4A3, COL11A1, P4HA3, COL4A1, COL22A1, COL4A2, CCR5, CCR4, HTR1B, COL6A6, CXCL5, AGTR2, NPY, CXCL13, ADRA2A, GRM7, COL18A1, CXCR6, GNB4, CXCL16, COL17A1, COL15A1, ADCY5, CCL13, COL13A1, CX3CR1, COL27A1, CCL21, CCR7, CXCR3, CXCL10, COL10A1, COL14A1, GPSM1, LPAR1, COL7A1, SSTR1                                                                                                                                                                                                                                                                                                                                                    |
| 2       | 30.879                    | 158   | 2424  | CD163, CCL11, IL21R, CD209, HTR7, SCG2, TLR7, F5, CD38, TNFSF9, EVA1A, SLAMF1, EDNRA, CD69, GPR83, MMP13, BTLA, KALRN, GZMK, IDO1, ADM2, CALCR, GPHA2, TNC, GPR84, IGFBP3, GPR68, GPR29, CD3E, NTS, CD3D, IL1RN, IL11, PRF1, GZMB, LAG3, TNFRSF4, TNFSF4, TNFSF13B, HLA-DRA, TNFSF11, ADRA1A, CTLA4, CD80, CYR61, IGFBP7, APOA1, FASLG, ITGB4, FCGR2A, CD40LG, PDCD1, ADCYAP1R1, ADCYAP1, CCL8, ITGA8, STC2, CD247, ZAP70, IL7R, IL7, SPP1, OASL, CD5, NCAM1, CD48, STAT4, CD244, BCL6, EDNRB, FCGR1A, OXTR, CIITA, CD1C, JAK3, CD28, ITGA4, ITGB7, TIGIT, FCGR1B, CD226, IBSP, IRF6, IL1B, HTR2C, AGTR1, ITGAX, GZMA, DMP1, IL3RA, PNPLA2, CD8A, CR2, CD8B, VIPR1, MEPE, IRF7, IL2RA, PRDM1, IL2RB, ADORA2B, KLRB1, KISS1, GNRH1, HLA-DPA1, CD52, SERPINA1, LUM, HLA-DPB1, HLA-DQB2, GBP1, TBXA2R, UTS2, SELE, TNFRSF18, CD27, CD70, CXCL14, EOMES, ITGB3, FN1, LCK, OAS3, PRSS23, CD34, VCAM1, GLP2R, ITGAL, |

|   |        |     |      |                                                                                                                                                                                                                                                                                                                                                                                                                                                                                                                                                                                                                                                                                                                                                                                                                                                                                                                                                                                                                                                                                                                                                                                                                                           |
|---|--------|-----|------|-------------------------------------------------------------------------------------------------------------------------------------------------------------------------------------------------------------------------------------------------------------------------------------------------------------------------------------------------------------------------------------------------------------------------------------------------------------------------------------------------------------------------------------------------------------------------------------------------------------------------------------------------------------------------------------------------------------------------------------------------------------------------------------------------------------------------------------------------------------------------------------------------------------------------------------------------------------------------------------------------------------------------------------------------------------------------------------------------------------------------------------------------------------------------------------------------------------------------------------------|
|   |        |     |      | GPBAR1, GPR65, VEGFA, TLR10, TMEM132A, DRD1, PTGER4, PTGER2, CD7, IL6, CD2, ITGA10, ITGA11, CD83, ITK, C4A, CCL7, IGFBP1, IGFBP4, MMP9, HLA-DQA2, KLRC1, KLRD1, CD276, P2RY10, FAM20A, FAM20C, PCSK9, RXFP1, THY1                                                                                                                                                                                                                                                                                                                                                                                                                                                                                                                                                                                                                                                                                                                                                                                                                                                                                                                                                                                                                         |
| 3 | 11.954 | 175 | 1040 | ACACB, FASN, SLC2A3, IRS2, LIF, ACTG2, PTX3, LYPD1, KRT18, SLC27A6, PDK4, PRND, TNFAIP3, SOX2, SERPINF2, SH2D1A, LAMA4, ACAN, SERPINE2, NTF3, ADAMTS9, SREBF1, PRSS3, NTM, NEGR1, PGF, MYH9, ZBTB16, KLRF1, CLEC5A, CD6, ALCAM, GNLY, CIDEA, CIDEA, ANGPT2, GBP5, ADAMTS8, MYOCD, FGF1, NEB, MMP11, FCGR3A, SLC2A5, MYH14, SAMHD1, CDK6, CNN2, CCND1, PLAUR, PLAUR, OSM, GPAM, SLAMF6, GZMH, SERPINE1, MLXIPL, CD74, SGCD, THSD7B, EMR1, TNFRSF11B, PPARGC1A, PTPRB, HBB, WNT5A, LPL, MMP1, CD14, CD93, DGAT2, VTN, GDNF, SEMA5B, RNF182, ITGA2, LAMB3, STBD1, METTL7A, LYPD3, CPM, SBSPON, DIO2, LAMA2, SLC2A4, FIGF, RAET1G, FLT4, CASP1, NLRP3, TRAT1, PNPLA3, BMP7, MMP25, SDC1, ACTC1, GFAP, CDKN2A, IL1R2, TNN, VASP, GLIS2, ACE, PLIN2, ADAMTS16, TREM1, FBXL22, NKG7, FBXL13, NT5E, ASB2, MYL3, ASB4, LIPE, SCD, OSCAR, CTGF, LMO7, DLL4, S100B, IFI6, LILRB1, CASQ2, PRKCQ, CD300A, JAG1, TIMP3, MME, RORC, TNFSF18, FGF22, PLIN1, EGR1, LYVE1, CD3G, SP7, FGF7, TNF, RUNX2, ADAM8, LY6H, ASPN, LYPD2, OLR1, M ICB, DPP4, HCST, THRSP, MGAM, HGF, CHAD, SPARC, LDB3, SOCS3, MYOZ2, FABP4, SKAP1, TRIM63, FBXO2, MS4A1, PCK1, CD79B, TNFRSF8, CD79A, ULBP1, CR1, ADAMTS12, TLL1, LAMC3, LAMA3, SPSB1, SEMA5A, ADAMTS15, THBS2, AR |
| 4 | 6.862  | 175 | 597  | PPP1R12B, GPT, LIFR, IL22RA1, TPM2, CACNG8, TNFAIP6, GRIN2D, TMEM26, F3, MFAP5, KIF26B, GUCY1A2, NR2F2, CRTAM, GRIA4, RBP4, AFAP1L1, GATA4, KIF1A, KIF5A, CALD1,                                                                                                                                                                                                                                                                                                                                                                                                                                                                                                                                                                                                                                                                                                                                                                                                                                                                                                                                                                                                                                                                          |

|   |     |   |    |                                                                                                                                                                                                                                                                                                                                                                                                                                                                                                                                                                                                                                                                                                                                                                                                                                                                                                                                                                                                                                                                                                                                                                                    |
|---|-----|---|----|------------------------------------------------------------------------------------------------------------------------------------------------------------------------------------------------------------------------------------------------------------------------------------------------------------------------------------------------------------------------------------------------------------------------------------------------------------------------------------------------------------------------------------------------------------------------------------------------------------------------------------------------------------------------------------------------------------------------------------------------------------------------------------------------------------------------------------------------------------------------------------------------------------------------------------------------------------------------------------------------------------------------------------------------------------------------------------------------------------------------------------------------------------------------------------|
|   |     |   |    | KDEL3, SYN1, GDF15, TAGLN,<br>MATK, TMOD1, PLAC8, CTSE,<br>GUCY1A3, CNTFR, GUCY1B3, PADI2,<br>GPD1, GPR174, HLA-DOA, PPARG,<br>WIF1, TAGLN3, CNN1, ISG15, FZD8,<br>IFIT1, ABCA1, FOXO3, FZD7, NLGN1,<br>ID1, SH3PXD2A, RET, ROBO2, HEY1,<br>SLIT3, NOTCH3, NKD1, CTSW, SFRP5,<br>KIF21A, WISP1, NRCAM, KIF21B,<br>IL12RB2, HTRA1, SEMA7A, CTHRC1,<br>NPR1, PDE5A, PLN, FST, SHISA9,<br>NME1, MAPT, RNASE2, RSAD2, NOG,<br>ASPG, TPM1, MYLK, ENPP1, MYL9,<br>CASP5, G6PD, MRAP, VDR, ITGBL1,<br>GRIK4, BPI, CTSG, DLX5, NFASC, LY9,<br>PKP2, CAMP, SOX10, RELN, JPH2,<br>MYH7, SPTBN2, PHEX, EPHA1, MYOT,<br>EFNB3, TGFB3, BAIAP2, ABCB1, FOSL1,<br>MXRA5, JUNB, ADAMTS14, ITLN1,<br>MCAM, TRDN, DLG2, SHANK1,<br>GRID2, ADIPOQ, WNT9B, MYOZ1,<br>RASGRF2, NLRC5, HIP1R, TCAP,<br>CLEC11A, KRT14, CTSV, JAG2, CYFIP2,<br>WASF3, IER2, ACTA2, RHOB, PDE4D,<br>MYH11, EPHA7, CYP19A1, ADAM12,<br>EPHB6, PLP1, EPHB1, UNC13A, JUP,<br>PRLR, EGF, TNNT2, KIF5C, PDE6A,<br>SCIN, FOSB, STMN2, AIM2, FOXO1,<br>BTG2, SLAMF7, KIF19, CTSC, CFP,<br>GLI3, CST7, PTCH1, CACNA2D3,<br>MSTN, SEMA6B, RHOU, EGR3, EGR2,<br>ERBB3, GAP43, TRAF3IP3, ELAVL4,<br>TGFA, PLXNB3, PLD4, FRK, CATSPERB |
| 5 | 4.8 | 6 | 12 | AKR1C1, GPX8, AKR1C2, TXNRD1,<br>NQO1, ALDH3A1                                                                                                                                                                                                                                                                                                                                                                                                                                                                                                                                                                                                                                                                                                                                                                                                                                                                                                                                                                                                                                                                                                                                     |

Table S4. The hub miRNAs and Its target genes.

| miRNA           | Genes targeted by miRNAs | Gene counts |
|-----------------|--------------------------|-------------|
| has-let-7a-5p   | COL9A1, THBS1, COL4A2    | 3           |
| has-let-7e-5p   | THBS1, ITGB3, COL4A1     | 3           |
| has-miR-6766-3p | COL9A1, ITGA2            | 2           |
| has-let-7d-5p   | THBS1, COL1A1            | 2           |
| has-miR-27b-3p  | ITGA2, FN1               | 2           |
| has-miR-106b-5p | COL4A1, COL4A3           | 2           |
| has-miR-29a-3p  | COL6A3, LAMA2            | 2           |
| has-miR-148a-3p | ITGA11, LAMA4            | 2           |
| has-miR-326     | TNC, FRAS1               | 2           |
| has-miR-25-3p   | NPNT, ITGA8              | 2           |
| has-miR-98-5p   | COL4A1, COL4A2           | 2           |

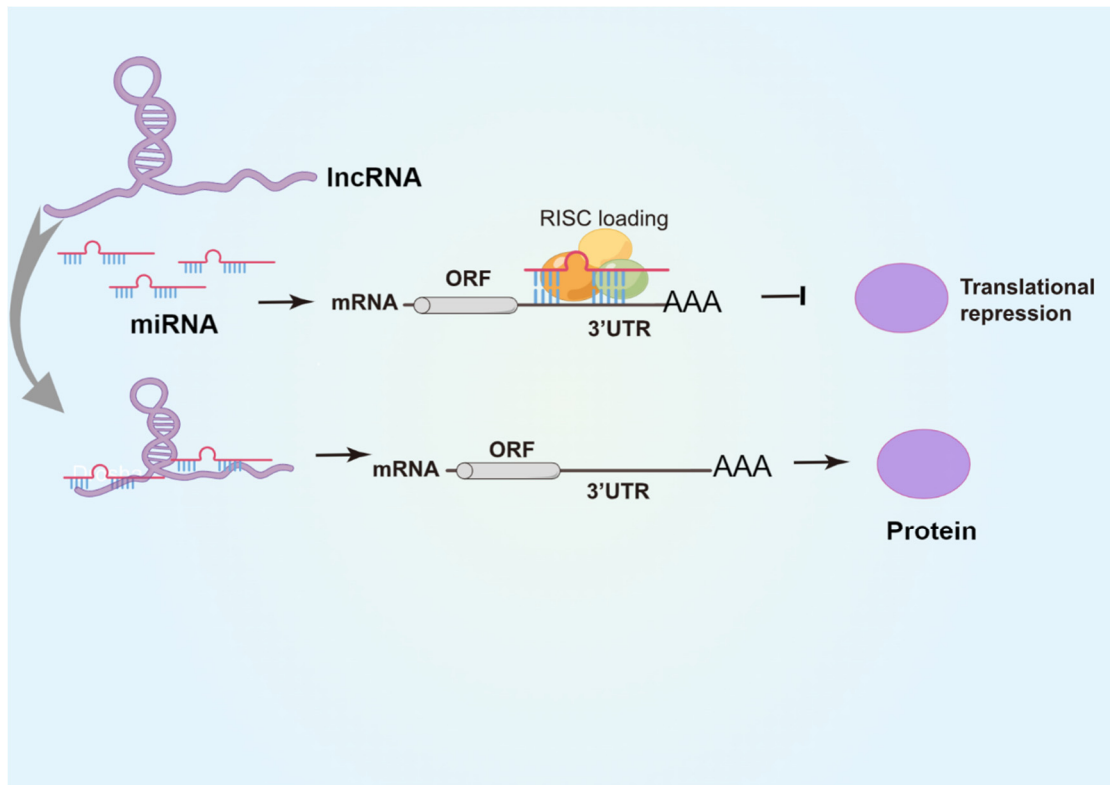

**Supplementary Figure S1.** The schematic diagram of lncRNA-mediated ceRNA regulatory network.
